# Supplementary material for: Recent SARS-CoV-2 infection abrogates antibody and B-cell responses to booster vaccination
Source: PubMed Central journal article supplement (PMC9460969; doi:10.1101/2022.08.30.22279344), 2022-08-31
Supplement: media-1.pdf [file media-1.pdf]

# SUPPLEMENTAL FIGURES AND TABLES

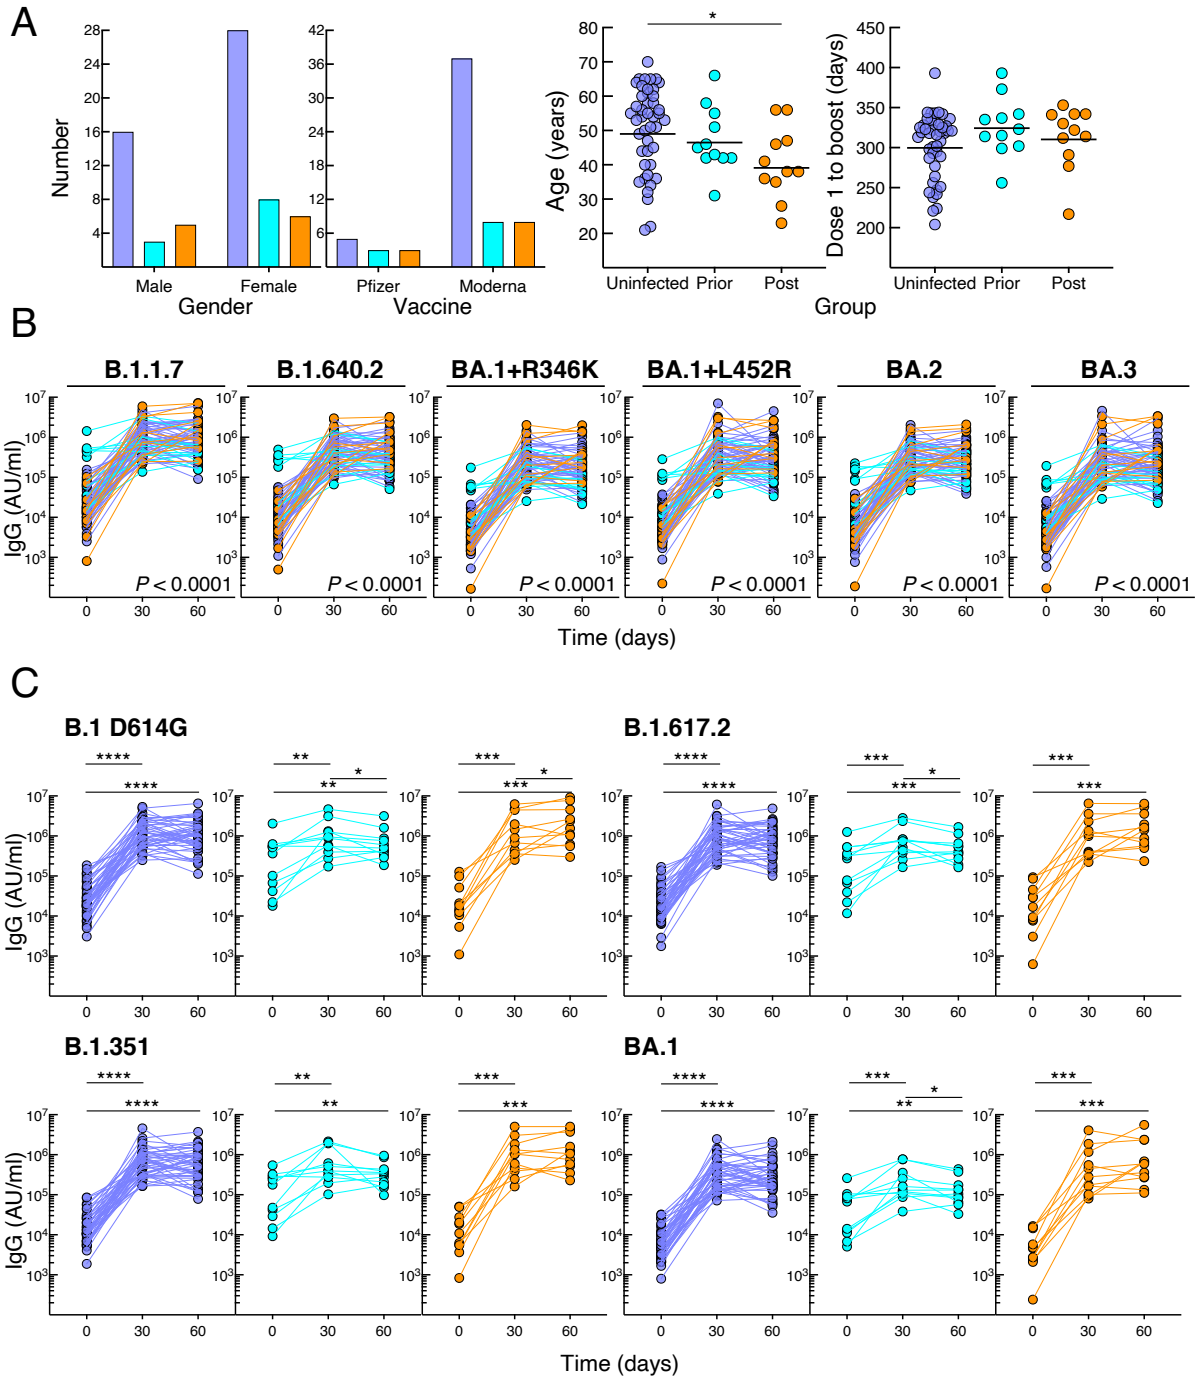

**D**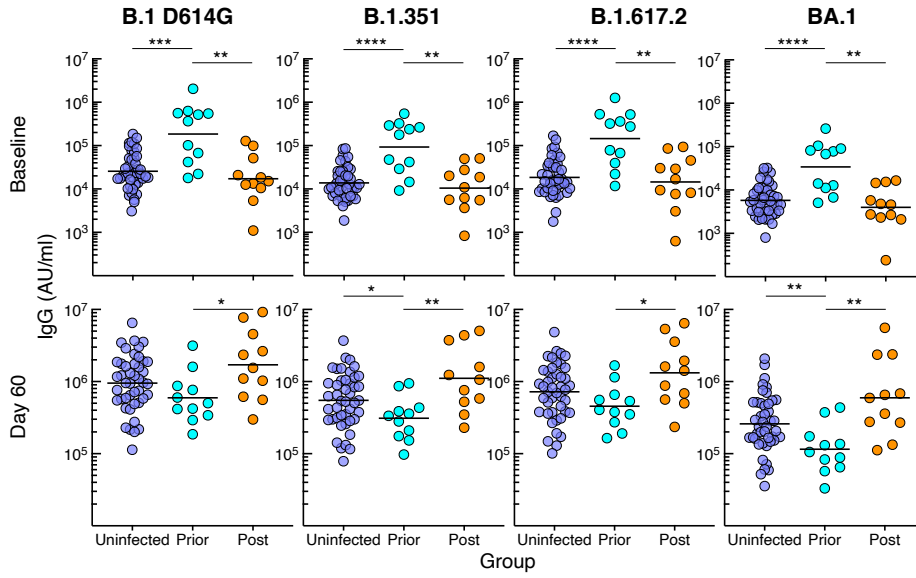**E**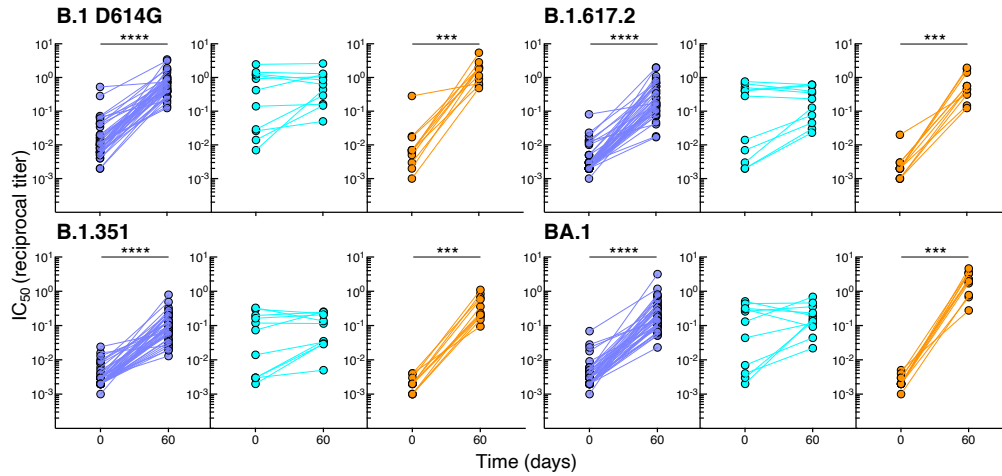**F**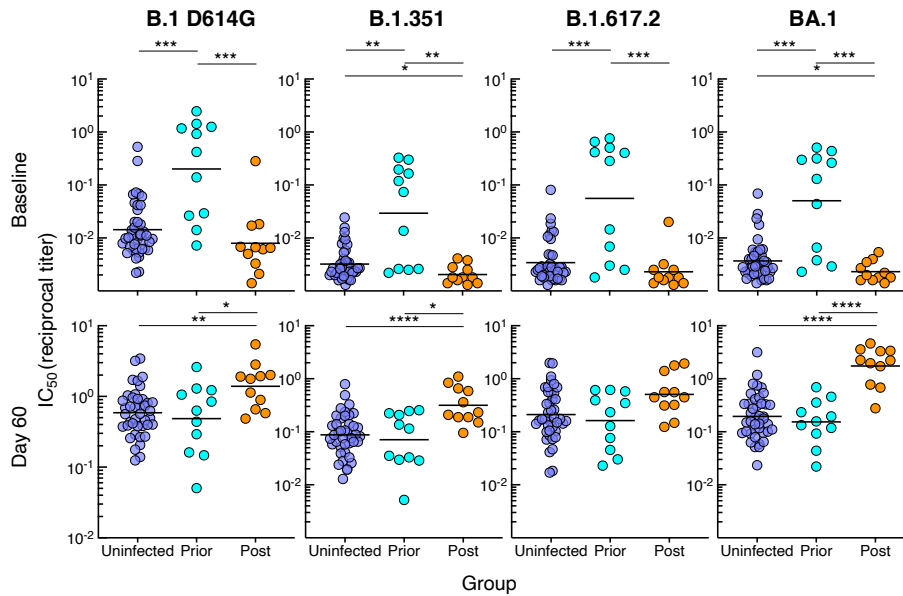

**Figure S1. Demographics and antibody responses to booster vaccination**

- (A) Comparison between the groups for gender, vaccine, age, and interval between dose 2 and booster vaccination.
- (B) Serum IgG spike-binding titers for additional variants, expressed as in Figure 1B.
- (C) Serum IgG spike-binding titers in Figure 1B shown by group.
- (D) Comparison between the groups at baseline and day 60 of serum IgG spike-binding titers in Figure 1B.
- (E) Serum neutralizing titers in Figure 1D shown by group.
- (F) Comparison between the groups at baseline and day 60 of serum neutralizing titers in Figure 1D.

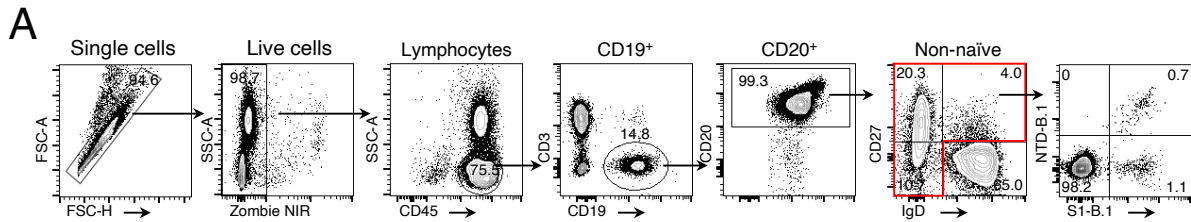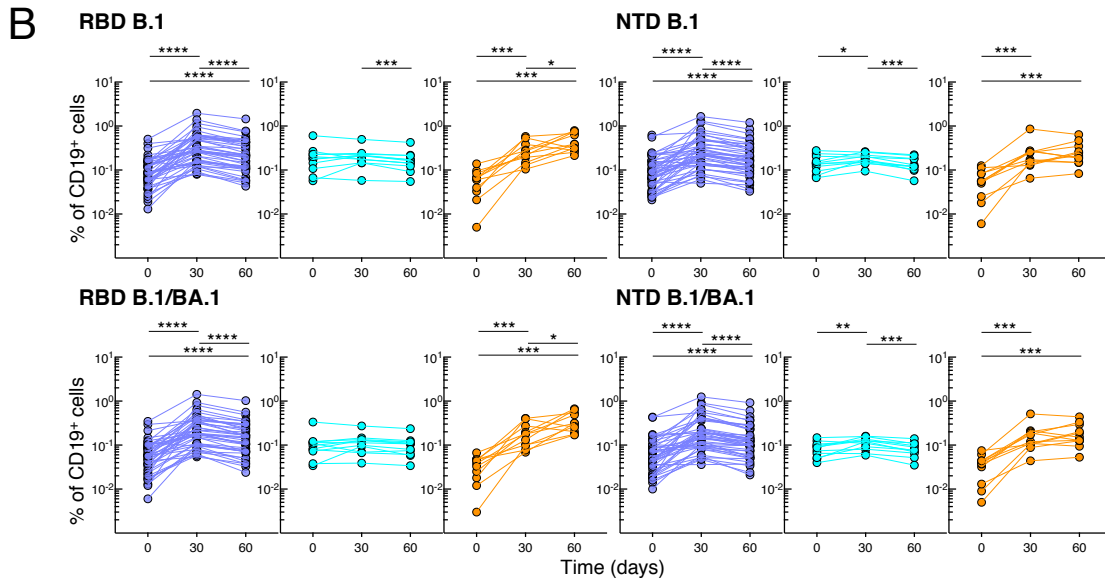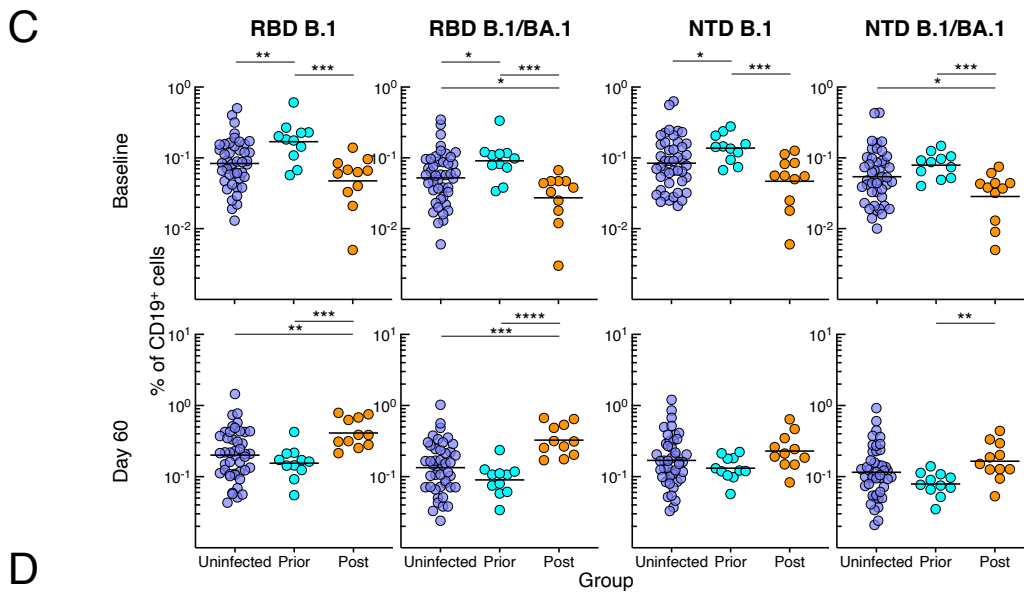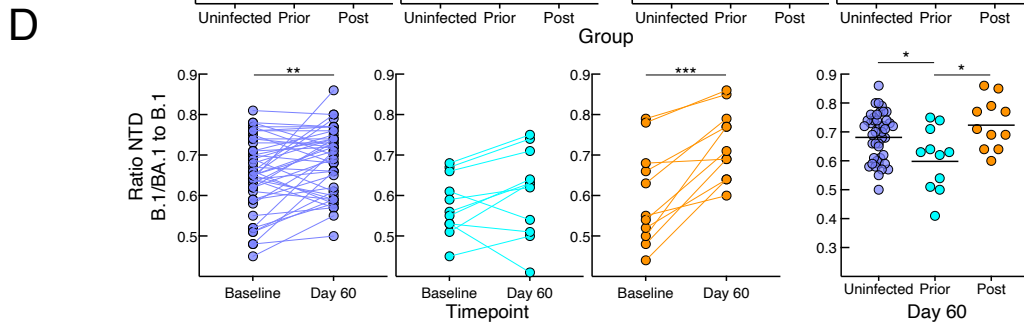

## **Figure S2. Spike-binding B cells**

- (A) Gating strategy for identifying non-naïve B cells; also showing representative binding of B.1 NTD and S1 tetramers.
- (B) Frequencies of B.1 and BA.1 RBD and NTD tetramer-binding B cells in Figure 2B shown by group.
- (C) Comparison between the groups at baseline and day 60 of frequencies of B.1 and BA.1 RBD and NTD tetramer-binding B cells in Figure 2B.
- (D) As in Figure 2D but for NTD.

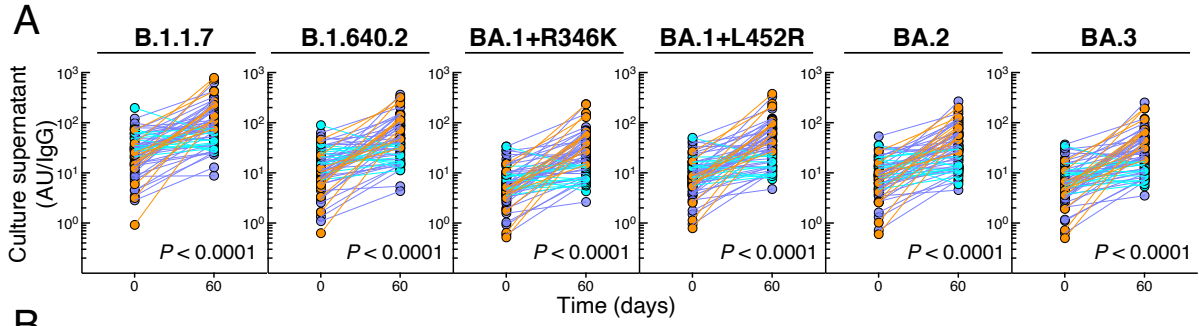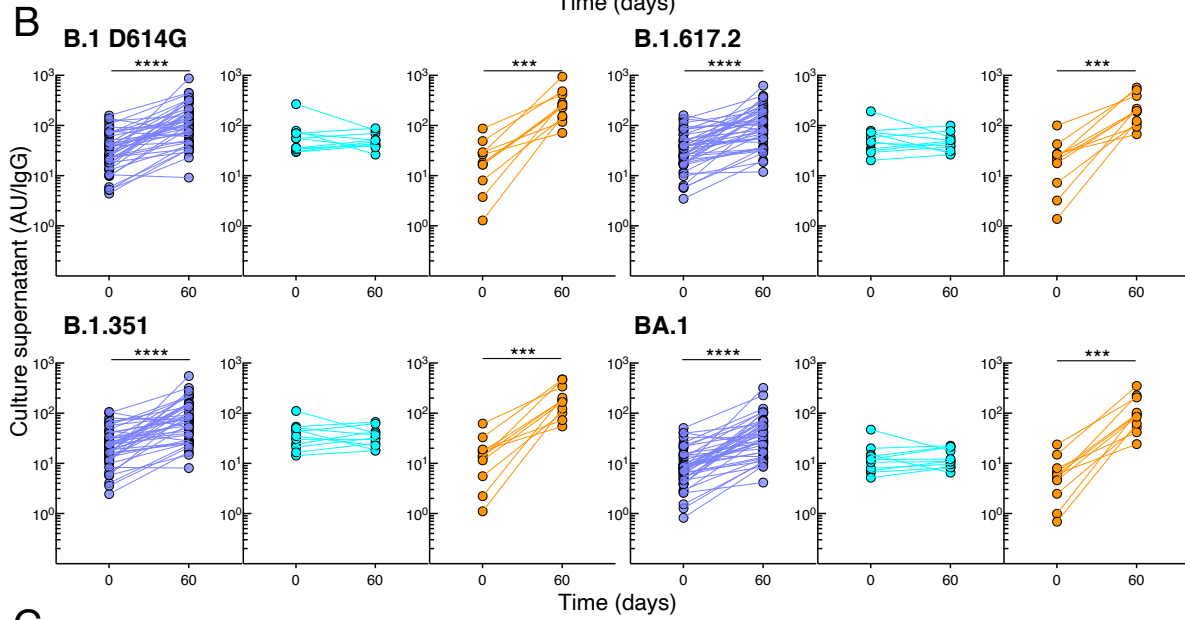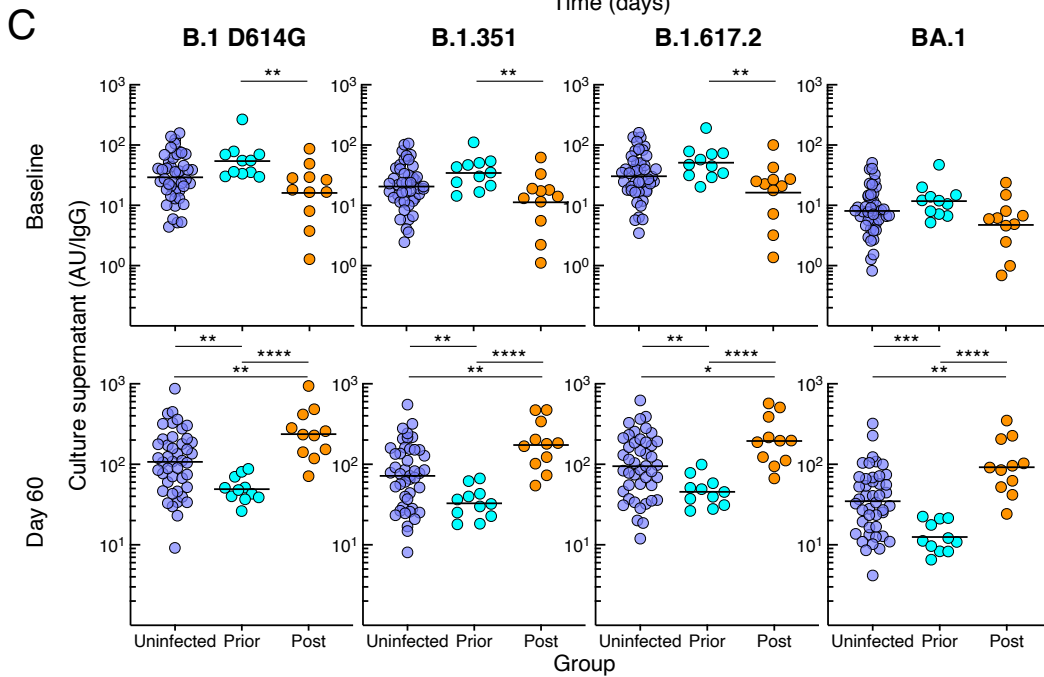

**Figure S3. Spike-binding antibodies secreted from B cells in cultured PBMCs**

- (A) Secreted IgG spike-binding titers for additional variants, expressed as in Figure 3A.
- (B) Secreted IgG spike-binding titers in Figure 3A shown by group.
- (C) Comparison between the groups at baseline and day 60 of secreted IgG spike-binding titers in Figure 3A.

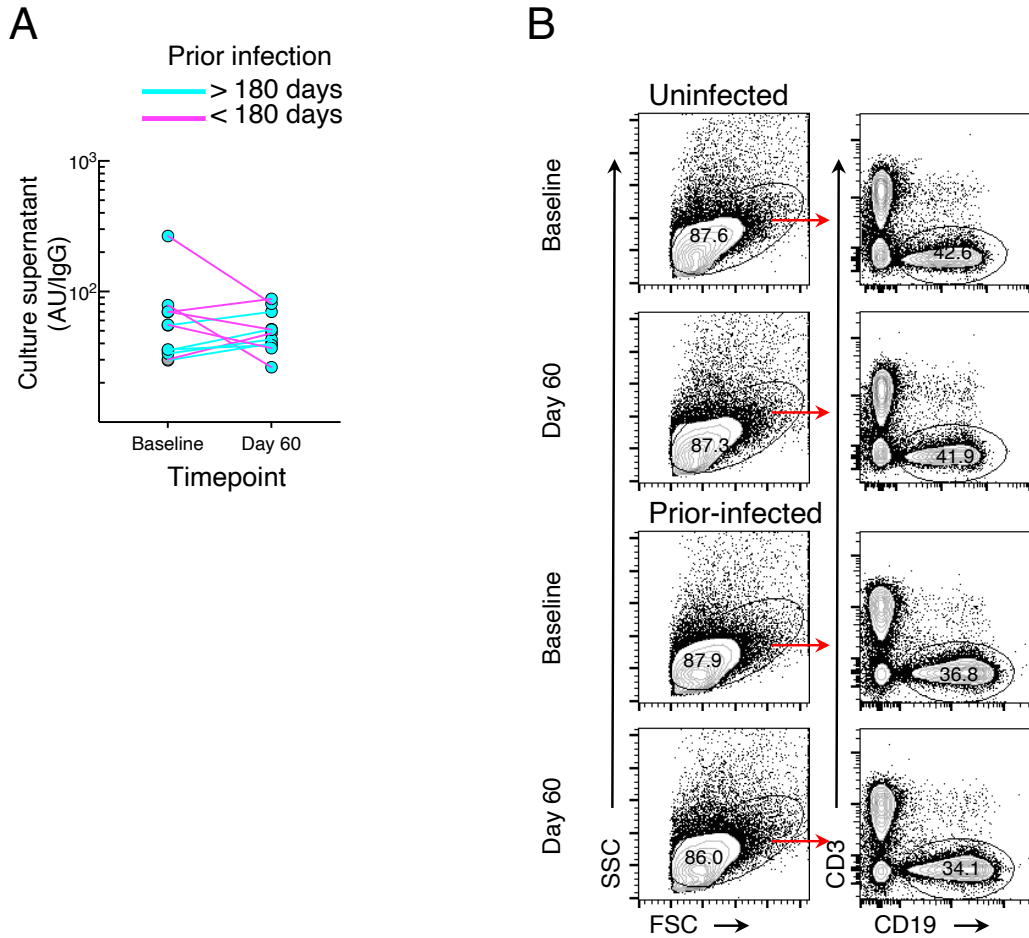

**Figure S4. *In vitro* proliferation studies**

(A) Secreted antibodies in Figure S3B for the prior-infected group against B.1 D614G spike shown color-coordinated by time of infection relative to booster vaccination. PBMCs of the six individuals with interval < 180 days were stimulated to evaluate cell division by CFSE dilution.

(B) Gating of live CD19<sup>+</sup> cells after four days in culture.



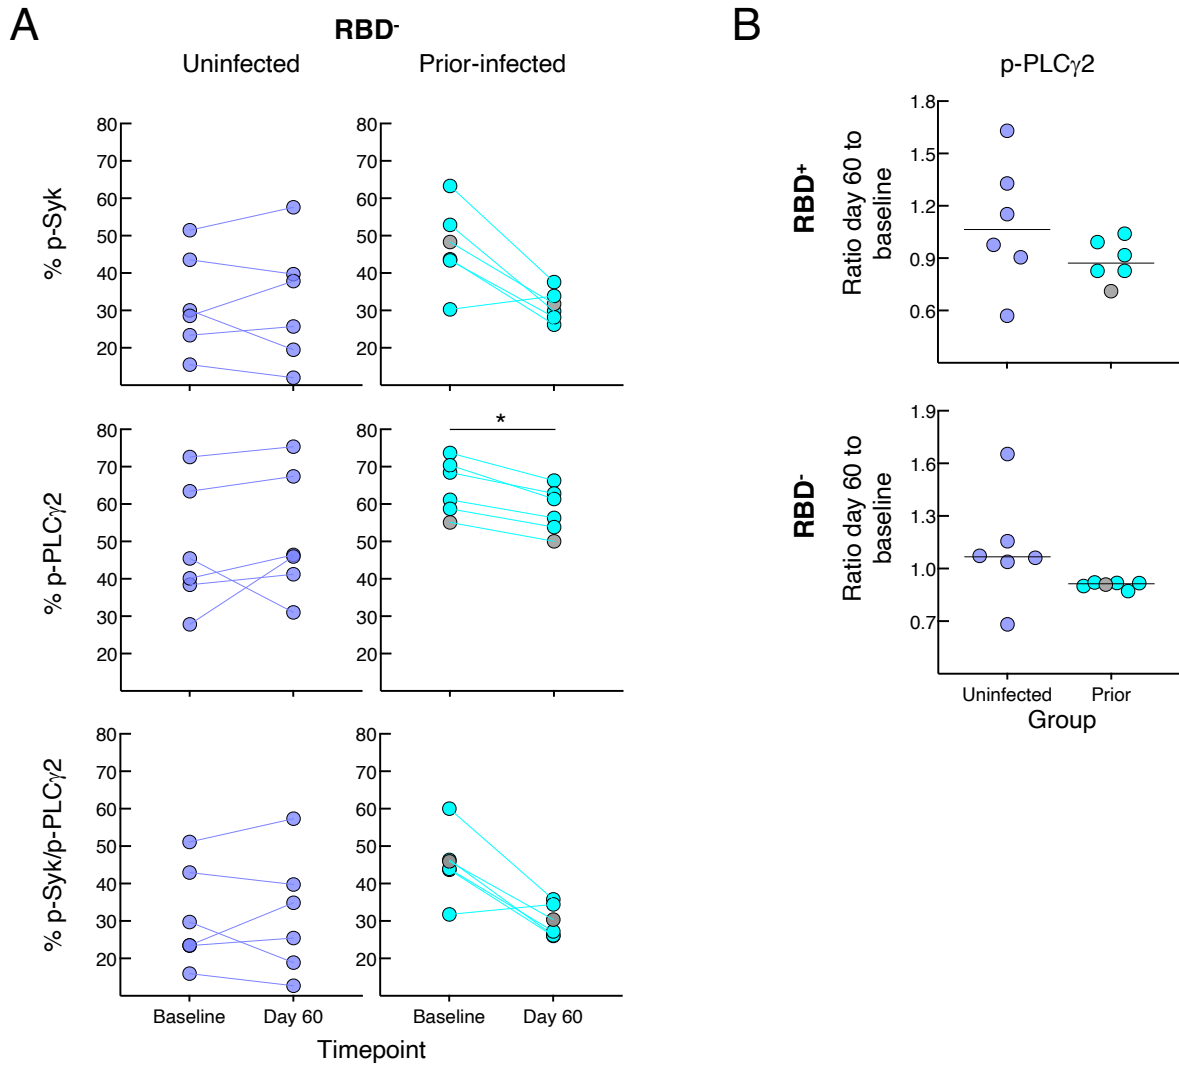

**Figure S5. *In vitro* BCR signaling studies**

(A) As in Figure 5B but for RBD<sup>-</sup> B cells.

(B) As in Figure 5C but for single PLC $\gamma$ 2.

**Table S1: P values for serum binding antibody increase over time or between group pairs**

| Variant    | Unin <sup>a</sup> day 0-30 | Unin day 0-60 | Unin day 30-60 | Prior infected day 0-30 | Prior infected day 0-60 | <sup>b</sup> Prior infected day 30-60 | Post infected day 0-30 | Post infected day 0-60 | Post infected day 30-60 | Prior vs unin day 0 | <sup>c</sup> Prior vs unin day 60 | Prior vs Post day 0 | <sup>c</sup> Prior vs Post day 60 | Post vs unin day 0 | Post vs unin day 60 | Day 60:0 fold unin vs prior | Day 60:0 fold post vs unin | Day 60:0 fold post vs prior |
|------------|----------------------------|---------------|----------------|-------------------------|-------------------------|---------------------------------------|------------------------|------------------------|-------------------------|---------------------|-----------------------------------|---------------------|-----------------------------------|--------------------|---------------------|-----------------------------|----------------------------|-----------------------------|
| B.1.1.7    | <0.0001                    | <0.0001       | ns             | 0.002                   | 0.002                   | ns                                    | 0.001                  | 0.001                  | 0.0186                  | <0.0001             | ns                                | 0.0014              | 0.0128                            | ns                 | ns                  | <0.0001                     | 0.0080                     | <0.0001                     |
| B.1.640.2  | <0.0001                    | <0.0001       | ns             | 0.0029                  | 0.0186                  | 0.042                                 | 0.001                  | 0.001                  | 0.0322                  | 0.0001              | ns                                | 0.0014              | 0.0052                            | ns                 | 0.0457              | <0.0001                     | 0.0060                     | <0.0001                     |
| BA.1 R346K | <0.0001                    | <0.0001       | ns             | 0.001                   | 0.0049                  | 0.0098                                | 0.001                  | 0.001                  | ns                      | 0.0001              | 0.0065                            | 0.0032              | 0.0024                            | ns                 | ns                  | <0.0001                     | 0.0174                     | <0.0001                     |
| BA.1 L452R | <0.0001                    | <0.0001       | ns             | 0.001                   | 0.0029                  | ns                                    | 0.001                  | 0.001                  | ns                      | <0.0001             | 0.0164                            | 0.0032              | 0.0024                            | ns                 | ns                  | <0.0001                     | 0.0222                     | <0.0001                     |
| BA.2       | <0.0001                    | <0.0001       | ns             | 0.002                   | 0.0049                  | 0.0322                                | 0.001                  | 0.001                  | 0.0244                  | <0.0001             | ns                                | 0.0014              | 0.0041                            | ns                 | 0.0249              | <0.0001                     | 0.0145                     | <0.0001                     |
| BA.3       | <0.0001                    | <0.0001       | ns             | 0.001                   | 0.0049                  | 0.0137                                | 0.001                  | 0.001                  | ns                      | <0.0001             | 0.008                             | 0.0024              | 0.0024                            | ns                 |                     | <0.0001                     | 0.0174                     | <0.0001                     |

<sup>a</sup>Uninfected

<sup>b</sup>Decreased from previous timepoint

<sup>c</sup>Decreased vs uninfected or post-infected

**Table S2: P values for group by time interaction for mixed-effects model of spike-binding serum antibody titers**

| Variant    | All     | Prior- vs post-<br>infected | Uninfected vs<br>prior-infected | Uninfected vs<br>post-infected |
|------------|---------|-----------------------------|---------------------------------|--------------------------------|
| B.1 D614G  | <0.0001 | <0.0001                     | <0.0001                         | 0.1589                         |
| B.1.1.7    | <0.0001 | <0.0001                     | <0.0001                         | 0.0706                         |
| B.1.315    | <0.0001 | <0.0001                     | <0.0001                         | 0.1589                         |
| B.1.617.2  | <0.0001 | <0.0001                     | <0.0001                         | 0.1589                         |
| B.1.640.2  | <0.0001 | <0.0001                     | <0.0001                         | 0.0683                         |
| BA.1       | <0.0001 | <0.0001                     | <0.0001                         | 0.0683                         |
| BA.1 R346K | <0.0001 | <0.0001                     | <0.0001                         | 0.1034                         |
| BA.1 L452R | <0.0001 | <0.0001                     | <0.0001                         | 0.1589                         |
| BA.2       | <0.0001 | <0.0001                     | <0.0001                         | 0.1034                         |
| BA.3       | <0.0001 | <0.0001                     | <0.0001                         | 0.1589                         |

**Table S3: P Values for group by time interaction for mixed-effects model of frequencies of spike-binding B cells**

| Spike tetramer | All     | Prior- vs post-infected | Uninfected vs prior-infected | Uninfected vs post-infected |
|----------------|---------|-------------------------|------------------------------|-----------------------------|
| B.1 S1         | <0.0001 | <0.0001                 | <0.0001                      | <0.0001                     |
| B.1 RBD        | <0.0001 | <0.0001                 | <0.0001                      | <0.0001                     |
| B.1 NTD        | <0.0001 | <0.0001                 | <0.0001                      | 0.0002                      |
| B.1.& BA.1 RBD | <0.0001 | <0.0001                 | <0.0001                      | <0.0001                     |
| B.1.& BA.1 NTD | <0.0001 | <0.0001                 | <0.0001                      | 0.0001                      |

**Table S4: *P* values for secreted antibody increase over time or between group pairs**

| Variant    | Unin <sup>a</sup> day 0-36 | Prior infected day 0-60 | Post infected day 0-60 | Prior vs unin day 0 | <sup>b</sup> Prior vs unin day 60 | Prior vs post day 0 | <sup>b</sup> Prior vs post day 60 | Post vs unin day 0 | Post vs unin day 60 | Day 60:0 fold unin vs prior | Day 60:0 fold post vs unin | Day 60:0 fold post vs prior |
|------------|----------------------------|-------------------------|------------------------|---------------------|-----------------------------------|---------------------|-----------------------------------|--------------------|---------------------|-----------------------------|----------------------------|-----------------------------|
| B.1.1.7    | <0.0001                    | ns                      | 0.001                  | 0.0154              | 0.007                             | 0.0024              | <0.0001                           | ns                 | 0.0029              | <0.0001                     | 0.0002                     | <0.0001                     |
| B.1.640.2  | <0.0001                    | ns                      | 0.001                  | 0.0220              | 0.006                             | 0.0052              | <0.0001                           | ns                 | 0.0045              | <0.0001                     | 0.0004                     | <0.0001                     |
| BA.1 R346K | <0.0001                    | ns                      | 0.001                  | ns                  | 0.0001                            | ns                  | <0.0001                           | ns                 | 0.0060              | <0.0001                     | 0.0001                     | <0.0001                     |
| BA.1 L452R | <0.0001                    | ns                      | 0.001                  | ns                  | 0.0006                            | ns                  | <0.0001                           | ns                 | 0.0039              | <0.0001                     | 0.0002                     | <0.0001                     |
| BA.2       | <0.0001                    | ns                      | 0.001                  | ns                  | 0.0031                            | ns                  | <0.0001                           | ns                 | 0.0031              | <0.0001                     | 0.0007                     | <0.0001                     |
| BA.3       | <0.0001                    | ns                      | 0.001                  | ns                  | 0.0006                            | ns                  | <0.0001                           | ns                 | 0.0033              | <0.0001                     | 0.0001                     | <0.0001                     |

<sup>a</sup>Uninfected

<sup>b</sup>Decreased vs uninfected or post-infected

**Table S5: P values for group by time interaction for mixed-effects model of spike-binding secreted antibody titers**

| Variant    | All     | Prior- vs post-infected | Uninfected vs prior-infected | Uninfected vs post-infected |
|------------|---------|-------------------------|------------------------------|-----------------------------|
| B.1 D614G  | <0.0001 | <0.0001                 | <0.0001                      | 0.0001                      |
| B.1.1.7    | <0.0001 | <0.0001                 | <0.0001                      | <0.0001                     |
| B.1.315    | <0.0001 | <0.0001                 | <0.0001                      | 0.0001                      |
| B.1.617.2  | <0.0001 | <0.0001                 | <0.0001                      | 0.0001                      |
| B.1.640.2  | <0.0001 | <0.0001                 | <0.0001                      | 0.0001                      |
| BA.1       | <0.0001 | <0.0001                 | <0.0001                      | <0.0001                     |
| BA.1 R346K | <0.0001 | <0.0001                 | <0.0001                      | 0.0001                      |
| BA.1 L452R | <0.0001 | <0.0001                 | <0.0001                      | 0.0001                      |
| BA.2       | <0.0001 | <0.0001                 | <0.0001                      | 0.0001                      |
| BA.3       | <0.0001 | <0.0001                 | <0.0001                      | 0.0001                      |

**Table S6: 21-color flow cytometry panel**

| Reagent                                             | Source          |
|-----------------------------------------------------|-----------------|
| Mouse anti-human CD45 BUV805 (clone HI30)           | BD Biosciences  |
| Mouse anti-human CD19 BV650 (Clone SJ25-C1)         | BD Biosciences  |
| Mouse anti-human CD20 APC-H7 (Clone 2H7)            | BD Biosciences  |
| Mouse anti-human CD10 BV510 (Clone HI10a)           | BD Biosciences  |
| Mouse anti-human IgG PE-Cy7 (Clone G18-145)         | BD Biosciences  |
| Mouse anti-human CD11c BUV395 (clone B-Ly6)         | BD Biosciences  |
| Mouse anti-human CD3 BV570 (Clone UCHT1)            | Biolegend       |
| Mouse anti-human IgD BV605 (Clone IA6-2)            | Biolegend       |
| Mouse anti-human IgM BV711 (Clone MHM-88)           | Biolegend       |
| Mouse anti-human CD27 BV785 (Clone O323)            | Biolegend       |
| Mouse anti-human CD21 PE/Dazzle594 (Clone BU32)     | Biolegend       |
| Mouse anti-human CD38 APC/Fire810 (Clone HB-7)      | Biolegend       |
| Mouse anti-human CD71 Alexa Fluor 700 (Clone CY1G4) | Biolegend       |
| Mouse anti-human IgA VioBlue (Clone IS11-8E10)      | Miltenyi Biotec |
| SARS-CoV-2 S1 B.1 (#793806)                         | Biolegend       |
| SARS-CoV-2 Spike B.1 trimer (#SPN-C82E9)            | AcroBiosystems  |
| SARS-CoV-2 RBD B.1 (#SPD-C82E9)                     | AcroBiosystems  |
| SARS-CoV-2 RBD BA.1 (#SPD-C82E4)                    | AcroBiosystems  |
| SARS-CoV-2 S NTD B.1                                | In-house        |
| SARS-CoV-2 S NTD BA.1                               | In-house        |
| Streptavidin PE                                     | ThermoFisher    |
| Streptavidin APC                                    | ThermoFisher    |
| Streptavidin PE-Cy5.5                               | ThermoFisher    |
| Streptavidin Alexa Fluor 488                        | ThermoFisher    |
| Streptavidin BV421                                  | Biolegend       |
| Streptavidin BUV615                                 | BD Biosciences  |
| Zombie NIR Fixable Viability Dye                    | Biolegend       |
